# Supplementary material for: Influenza A Virus Assembly Intermediates Fuse in the Cytoplasm
Source: PubMed Central journal article supplement (PMC3946384; doi:10.1371/journal.ppat.1003971), 2014-03-06

Figure S4: Cytoplasmic localization of WSN PA-GFP, NP, and vRNA is CRM1 dependent

A. MDCK Cells + WSN PA-GFP (16hpi)

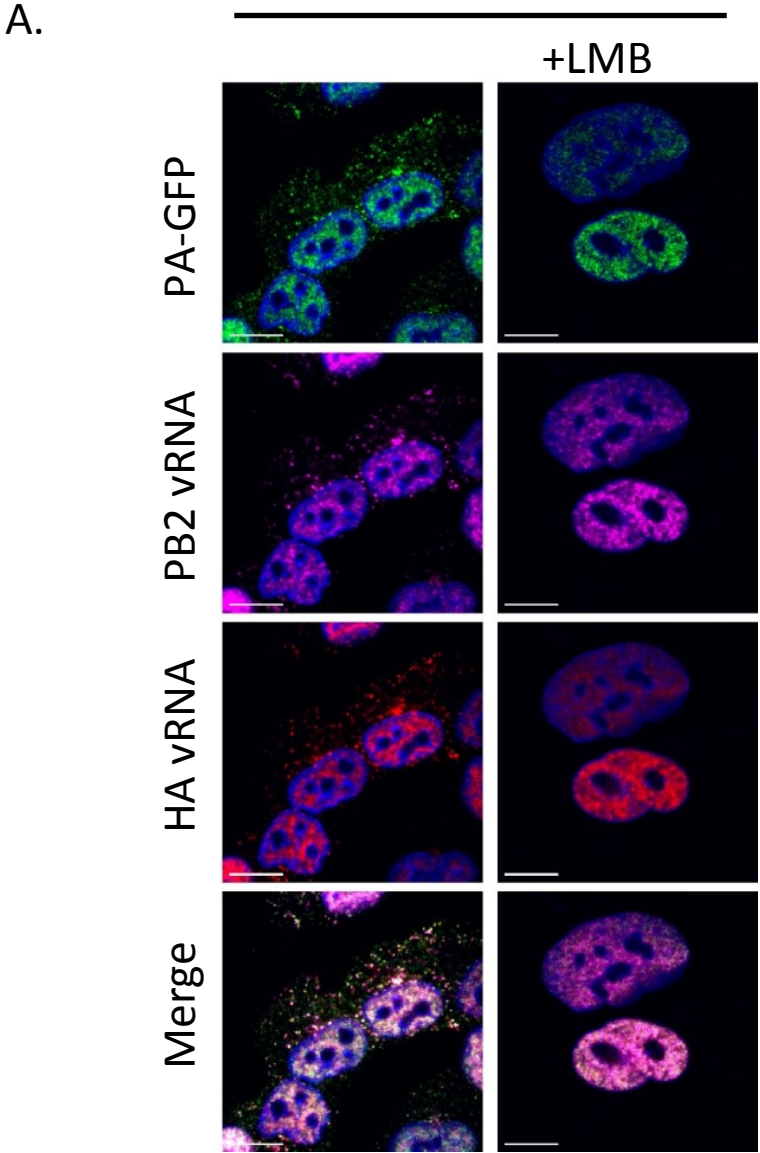

B.

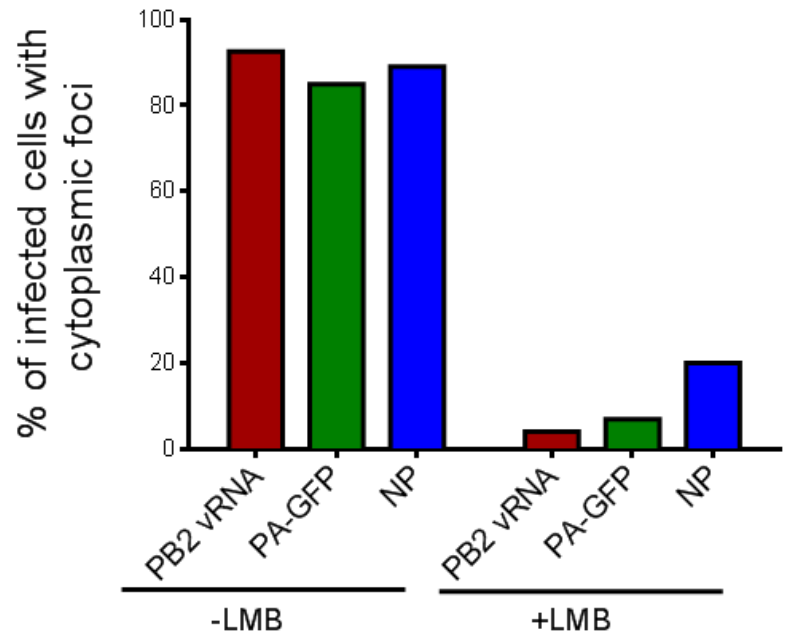

Supplement: ppat.1003971.s004.pdf [file ppat.1003971.s004.pdf]
