# Supplementary material for: Influenza A Virus Assembly Intermediates Fuse in the Cytoplasm
Source: PubMed Central journal article supplement (PMC3946384; doi:10.1371/journal.ppat.1003971), 2014-03-06

Figure S6: Colocalization of influenza vRNA with Rab11a

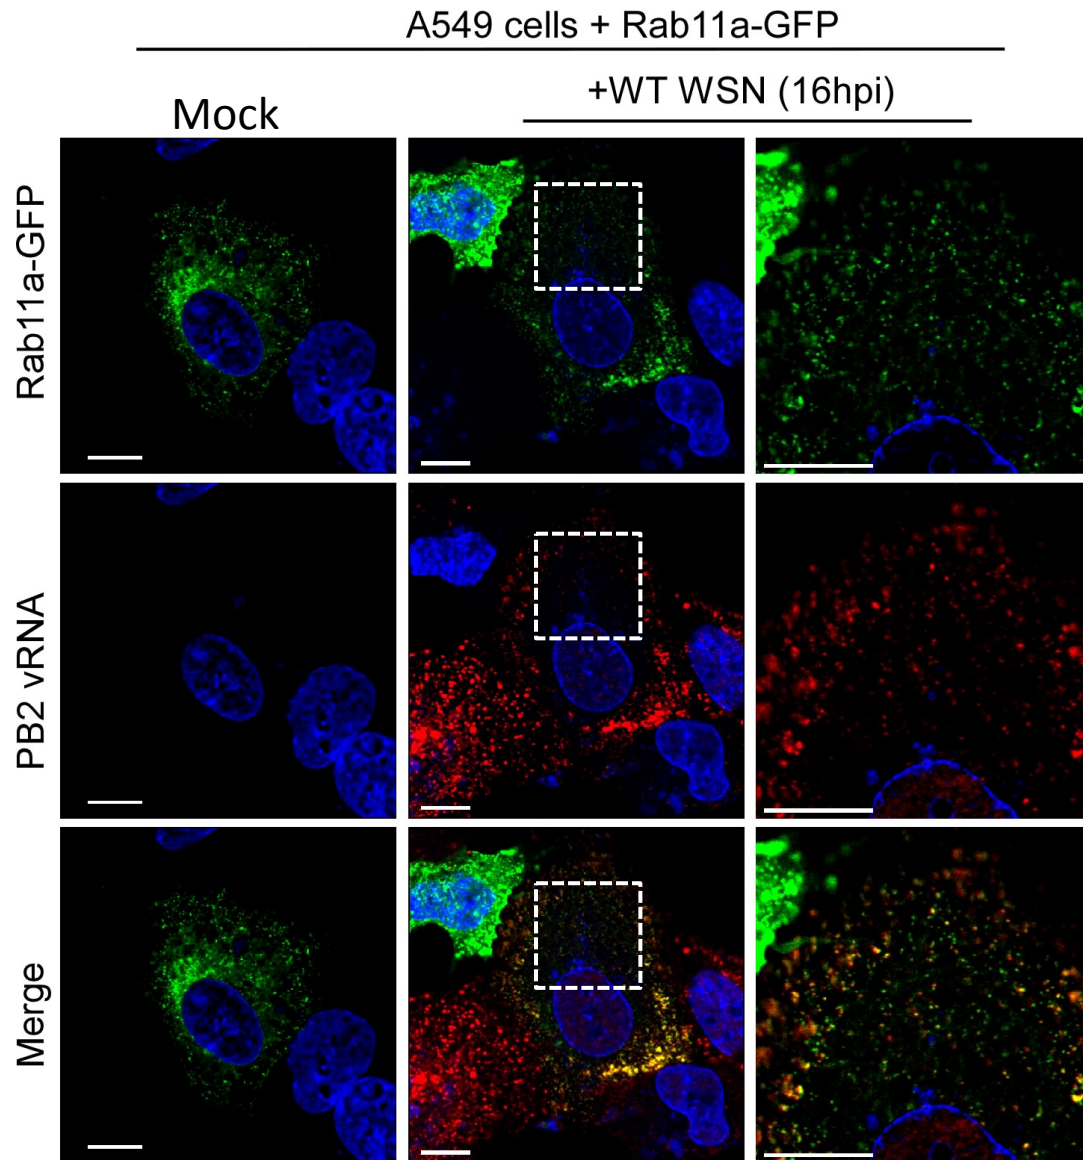

Supplement: ppat.1003971.s006.pdf [file ppat.1003971.s006.pdf]
