# Supplementary material for: Influenza A Virus Assembly Intermediates Fuse in the Cytoplasm
Source: PubMed Central journal article supplement (PMC3946384; doi:10.1371/journal.ppat.1003971), 2014-03-06
Supplement: ppat.1003971.s012.pdf [file ppat.1003971.s012.pdf]

Table S3: Number of transient colocalization and fusion events in PA-GFP tracks in A549 cells

| Track Number | Colocalization Events |                           | Track Duration (sec) |
|--------------|-----------------------|---------------------------|----------------------|
|              | Fusions               | Transient Colocalizations |                      |
| 1            | 0                     | 2                         | 45.00                |
| 2            | 0                     | 1                         | 32.00                |
| 3            | 0                     | 1                         | 17.00                |
| 4            | 0                     | 1                         | 44.00                |
| 5            | 0                     | 0                         | 46.00                |
| 6            | 0                     | 1                         | 23.00                |
| 7            | 0                     | 1                         | 27.00                |
| 8            | 0                     | 1                         | 19.00                |
| 9            | 1                     | 2                         | 31.00                |
| 10           | 1                     | 1                         | 25.00                |
| 11           | 0                     | 1                         | 19.00                |
| 12           | 0                     | 1                         | 20.00                |
| 13           | 0                     | 1                         | 19.00                |
| 14           | 0                     | 1                         | 58.00                |
| 15           | 0                     | 0                         | 18.00                |
| 16           | 0                     | 1                         | 18.00                |
| 17           | 0                     | 1                         | 62.00                |
| 18           | 0                     | 1                         | 20.00                |
| 19           | 0                     | 1                         | 8.00                 |
| 20           | 2                     | 2                         | 126.00               |
| 21           | 0                     | 1                         | 128.00               |
| 22           | 0                     | 1                         | 64.00                |
| 23           | 0                     | 1                         | 34.00                |
| 24           | 0                     | 0                         | 48.00                |
| 25           | 0                     | 1                         | 88.00                |
| 26           | 0                     | 1                         | 114.00               |
| 27           | 0                     | 1                         | 156.00               |
| 28           | 0                     | 1                         | 116.00               |
| 29           | 0                     | 1                         | 34.00                |
| 30           | 0                     | 1                         | 50.00                |
| 31           | 0                     | 0                         | 136.00               |
| 32           | 0                     | 1                         | 80.00                |
| 33           | 0                     | 2                         | 74.00                |
